# Supplementary material
Source: Research Square preprint supplement (doi:10.21203/rs.3.rs-9084932/v1)
Supplement: Supplementary file 1 [file 6b4cf414e309024fd97cc46c.docx]

| Characteristic | N | Mean ± SD / n (%) | Min–Max |
| --- | --- | --- | --- |
| Age (years) | 201 | 48.2 ± 11.2 | 19–77 |
| Sex   - - Male:   - Female: | 201 | 118 (58.7%)  83 (41.3%) | — |
| Residence   - - Urban:   - Rural: | 201 | 125 (62.2%)  76 (37.8%) | — |
| Transplant type   - - Living donor:   - Deceased donor: | 201 | 83 (41.3%)  118 (58.7%) | — |
| Graft vintage (months) | 201 | 78.8 ± 73.3 | 1–303 |
| Education level   - - <12 years:   - 12 years:   - Higher education: | 201 | 90 (44.8%)  55 (27.4%)  56 (27.8%) | — |
| Monthly income   - - <2000 lei:   - >2000 lei: | 201 | 127 (63.2%)  74 (36.8%) | — |

Table 1. Demographic characteristics of the study population

| Characteristic | N | Mean ± SD / n (%) | Min–Max |
| --- | --- | --- | --- |
| CKD stage (posttransplant)   - - Stage 1:   - Stage 2:   - Stage 3a:   - Stage 3b:   - Stage 4:   - Stage 5D: | 201 | 34 (16.9%)  63 (31.3%)  39 (19.4%)  30 (14.9%)  30 (14.9%)  5 (2.5%) | — |
| Renal disease etiology   - - Chronic glomerulonephritis:   - ADPKD:   - Chronic glomerulonephritis (unspecified):   - Vasculitis (p-ANCA):   - Diabetic nephropathy:   - Other causes*: | 201 | 57 (28.4%)  29 (14.4%)  10 (5.0%)  5 (2.5%)  5 (2.5%)  62 (30.9%) | — |
| Pretransplant dialysis (RRT) | 201 | 137 (68.2%) | — |
| Dialysis type   - - Hemodialysis (HD):   - Peritoneal dialysis (PD):   - Both: | 137 | 141 (70.1%)  12 (6%)  2 (1%) | — |
| Dialysis duration (months) | 137 | 35.9 ± 41.7 | 1-312 |
| Pretransplant immunosuppression | 201 | 33 (16.4%) | — |
| Type of immunosuppression   - - Corticosteroids only:   - Corticosteroids + calcineurin inhibitors:   - Triple regimen: | 33 | 24 (72.7%)  5 (15.1%)  3 (9.1%) | — |
| Post-transplant immunosuppression duration (months) | 201 | 78.8 ± 73.3 | 1-303 |

**Table 2**.Renal and transplant-related characteristics: ADPKD – autosomal dominant polycystic kidney disease; RRT – renal replacement therapy.

*Other causes include lupus nephritis, amyloidosis, interstitial nephritis, congenital anomalies, and other rare entities (≤1% each).

| Comorbidity | n (%) |
| --- | --- |
| Hypertension | 158 (78.6%) |
| Diabetes mellitus   - - Pretransplant diabetes   - Posttransplant diabetes | 31 (15.4%)  18 (9.0%)  13 (6.5%) |
| Vascular disease (any)   - - Coronary artery disease   - Peripheral arterial disease (AOMI)   - Stroke (CVA) | 10 (5.0%)  4 (2.0%)  3 (1.5%)  3 (1.5%) |
| Atrial fibrillation | 4 (2.0%) |

**Table 3**. Cardiovascular and metabolic comorbidities

| Parameter | Mean (Range) | Normal Reference | Abnormality (n, %) |
| --- | --- | --- | --- |
| Hemoglobin (g/dL) | 13.3± 2.2 (6.8–19.2) | 12–16 | 48 (24%) below normal |
| Serum Calcium (mg/dL) | 9.7± 0.7 (6.6–11.9) | 8.5–10.5 | 6 (6%) low  8 (9%) high |
| Serum Phosphate (mg/dL) | 3.2± 0.7 (1.4–8.5) | 2.5–4.5 | 27 (14%) low  9 (5%) high |
| PTH (pg/mL) | 90.2± 131.6 (3–1395.5) | 15–65 | 40 (21%) >150  10 (5%) >300 |

**Table 4**. Laboratory parameters of the study population: PTH – parathyroid hormone

| MMSE score | Interpretation | n | % |
| --- | --- | --- | --- |
| 24–30 | Normal cognitive function | 198 | 98.5% |
| 18–23 | Mild cognitive impairment | 3 | 1.5% |
| 0–17 | Moderate–severe cognitive impairment | 0 | 0.0% |
| Total | — | 201 | 100.0% |

**Table 5**.Distribution of Mini-Mental State Examination (MMSE) categories

| BDI score category | Interpretation | n | % |
| --- | --- | --- | --- |
| 0–13 | Minimal or no depression | 169 | 84.1% |
| 14–19 | Mild depression | 18 | 9.0% |
| 20–28 | Moderate depression | 7 | 3.5% |
| 29–63 | Severe depression | 3 | 1.5% |
| Missing | — | 4 | 2.0% |
| Total | — | 201 | 100.0% |

**Table 6**. Distribution of depressive symptom severity according to the Beck Depression Inventory

| Characteristic | N | Mean ± SD | Min–Max |
| --- | --- | --- | --- |
| Physical Functioning (PF) | 194 | 65.34 ± 24.79 | 0–100 |
| Role–Physical (RP) | 195 | 47.56 ± 42.06 | 0–100 |
| Bodily Pain (BP) | 195 | 66.79 ± 26.41 | 0–100 |
| General Health (GH) | 195 | 53.82 ± 15.10 | 20–95 |
| Vitality (VT) | 195 | 64.97 ± 18.72 | 0–100 |
| Social Functioning (SF) | 195 | 76.15 ± 21.73 | 25–100 |
| Role–Emotional (RE) | 195 | 56.07 ± 42.56 | 0–100 |
| Mental Health (MH) | 195 | 73.74 ± 19.37 | 0–100 |

**Table 7**. Descriptive statistics of the SF-36 domains

| Predictor | SF-36 Domain | Pearson’s r | p |
| --- | --- | --- | --- |
| Age | Physical Functioning (PF) | −0.279 | < .001 |
| Age | Role–Physical (RP) | −0.169 | .018 |
| Age | Social Functioning (SF) | −0.178 | .013 |
| Age | Bodily Pain (BP) | −0.167 | .019 |
| Age | Vitality (VT) | −0.148 | .039 |
| Graft age (months) | Role–Emotional (RE) | 0.147 | .040 |
| Beck score | Physical Functioning (PF) | −0.378 | < .001 |
| Beck score | Role–Physical (RP) | −0.351 | < .001 |
| Beck score | Role–Emotional (RE) | −0.379 | < .001 |
| Beck score | Social Functioning (SF) | −0.481 | < .001 |
| Beck score | Bodily Pain (BP) | −0.420 | < .001 |
| Beck score | General Health (GH) | −0.389 | < .001 |
| Beck score | Vitality (VT) | −0.595 | < .001 |
| Beck score | Mental Health (MH) | −0.596 | < .001 |
| Hemoglobin (Hb) | Social Functioning (SF) | 0.176 | .010 |
| Phosphorus (P) | Role–Emotional (RE) | 0.162 | .027 |
| Phosphorus (P) | General Health (GH) | −0.164 | .026 |

**Table 8**. Statistically significant correlations between clinical variables and SF-36 domains

| SF-36 Domain | Adjusted R² | Significant independent predictors (β, p) | Non-significant predictors |
| --- | --- | --- | --- |
| Physical Functioning (PF) | 0.10 | Beck: −0.34, *p* < 0.001 | Hb, immunosuppression |
| Role Physical (RP) | 0.11 | Beck: −0.35, *p* < 0.001 | Hb, immunosuppression |
| Bodily Pain (BP) | 0.17 | Beck: −0.41, *p* < 0.001 | Hb, immunosuppression |
| General Health (GH) | 0.17 | Beck: −0.38, *p* < 0.001 | Hb (trend), immunosuppression |
| Vitality (VT) | 0.37 | Beck: −0.59, *p* < 0.001Hb: +0.13, *p* = 0.025 | Immunosuppression |
| Social Functioning (SF) | 0.23 | Beck: −0.48, *p* < 0.001 | Hb, immunosuppression |
| Role Emotional (RE) | 0.13 | Beck: −0.38, *p* < 0.001 | Hb, immunosuppression |
| Mental Health (MH) | 0.37 | Beck: −0.59, *p* < 0.001 | Hb, immunosuppression (trend) |

**Table 9**. Independent determinants of SF-36 health-related quality-of-life domains: multivariate linear regression analysis

| SF-36 Domain | t | df | p |
| --- | --- | --- | --- |
| Role–Physical (RP) | 2.803 | 193 | .006 |
| Role–Emotional (RE) | 2.493 | 193 | .013 |
| Social Functioning (SF) | 2.635 | 193 | .009 |

**Table 10**. Differences in SF-36 domain scores according to pre-transplant renal replacement therapy
